# Supplementary material
Source: Springer Nature journal article supplement (https://www.springermedizin.de/resource/supplementary/13012_2010_267_MOESM1_ESM.pdf/9629596)
Supplement: MOESM1 [file 9629596]

## Assess

Barriers & Supports

Recommendations from BPGs

Collaborative Practice

### Adopters

Nurses and other professionals

- Attitudes
- Beliefs
- Practices

### Work Environment

- Workload
- Competing demands

+

## Monitor

Degree of use

### Multi-faced Intervention

Interactive educational workshop

- Reflective learning
- Feedback
- Mentoring

+

## Evaluate

Outcomes

### Adoption

Collaborative practice in action

### Evaluation

- Patients
- Professionals
- Organizations
- Systems
